# Supplementary material for: A comprehensive phylogenetic analysis of copper transporting P1B ATPases from bacteria of the Rhizobiales order uncovers multiplicity, diversity and novel taxonomic subtypes
Source: PubMed Central journal article supplement (PMC5552934; doi:10.1002/mbo3.452), 2017-02-20
Supplement: MBO3-6-na-s001.pdf [file MBO3-6-na-s001.pdf]

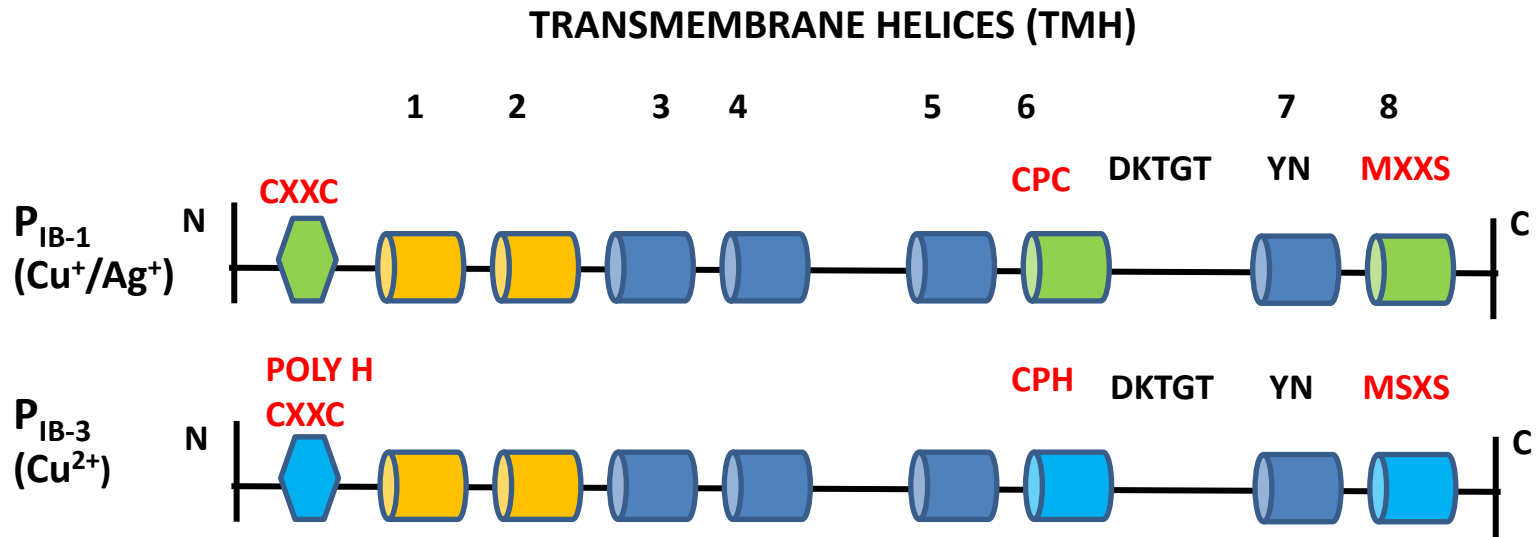

Fig. S1. Domain organization of P<sub>IB-1</sub> and P<sub>IB-3</sub> Cu-ATPases subtypes proposed by Argüello (2003, 2007). The N-terminal metal binding domain (MBD) and the metal-binding residues are indicated by a hexagon and amino acids in one letter code. The 8 transmembrane helices (TMH) and their strictly conserved residues are represented by cylinders and amino acids in one letter code. Residues in the TMH6 (CPC/CPH), TMH7 (YN) and TMH8 (MXXS/MSXS) are implicated in Cu<sup>+</sup> or Cu<sup>2+</sup> coordination. The aspartic residue (D) in the invariant DKTGT signature is the site of catalytic phosphorylation. Residues in red are conserved signature motifs conserved in most of P<sub>IB-1</sub> and P<sub>IB-3</sub> Cu-ATPases.
