# Supplementary material for: A comprehensive phylogenetic analysis of copper transporting P1B ATPases from bacteria of the Rhizobiales order uncovers multiplicity, diversity and novel taxonomic subtypes
Source: PubMed Central journal article supplement (PMC5552934; doi:10.1002/mbo3.452), 2017-02-20
Supplement: MBO3-6-na-s002.pdf [file MBO3-6-na-s002.pdf]

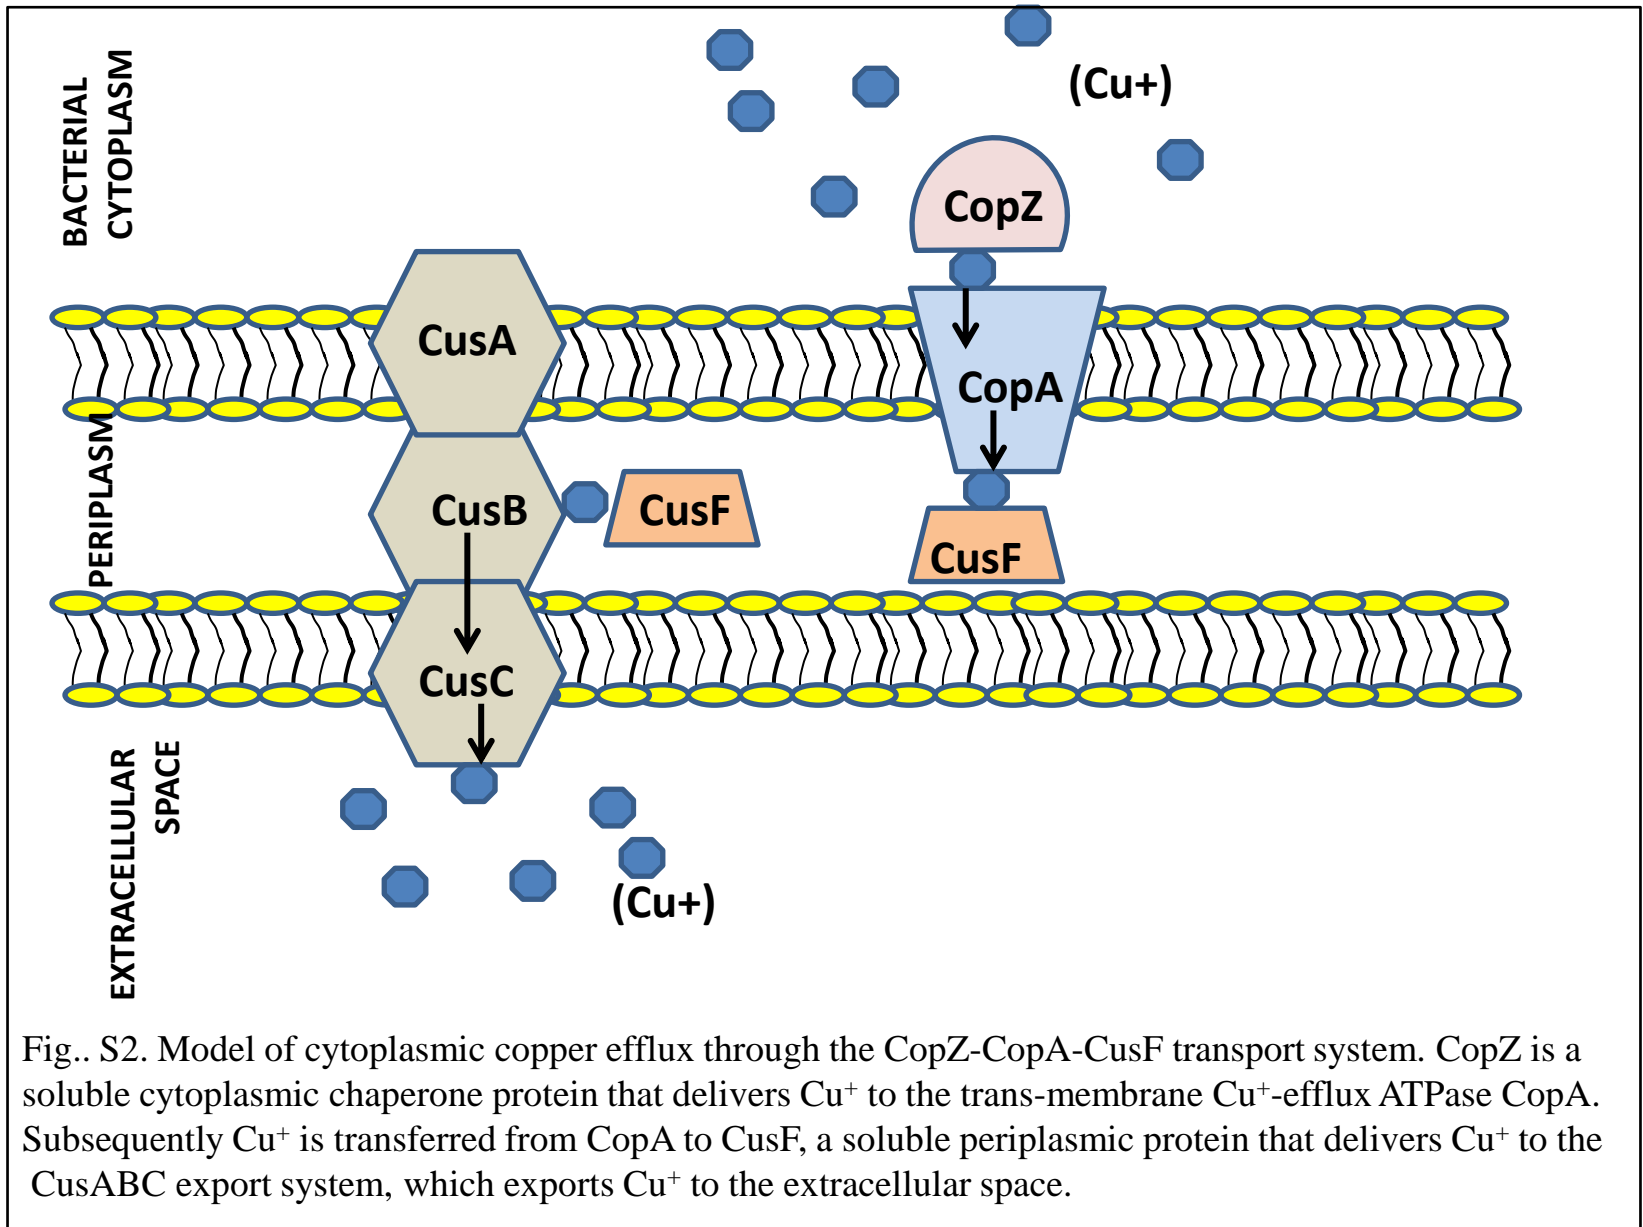

Fig.. S2. Model of cytoplasmic copper efflux through the CopZ-CopA-CusF transport system. CopZ is a soluble cytoplasmic chaperone protein that delivers  $\text{Cu}^+$  to the trans-membrane  $\text{Cu}^+$ -efflux ATPase CopA. Subsequently  $\text{Cu}^+$  is transferred from CopA to CusF, a soluble periplasmic protein that delivers  $\text{Cu}^+$  to the CusABC export system, which exports  $\text{Cu}^+$  to the extracellular space.
