# Supplementary material for: A comprehensive phylogenetic analysis of copper transporting P1B ATPases from bacteria of the Rhizobiales order uncovers multiplicity, diversity and novel taxonomic subtypes
Source: PubMed Central journal article supplement (PMC5552934; doi:10.1002/mbo3.452), 2017-02-20
Supplement: MBO3-6-na-s003.pdf [file MBO3-6-na-s003.pdf]

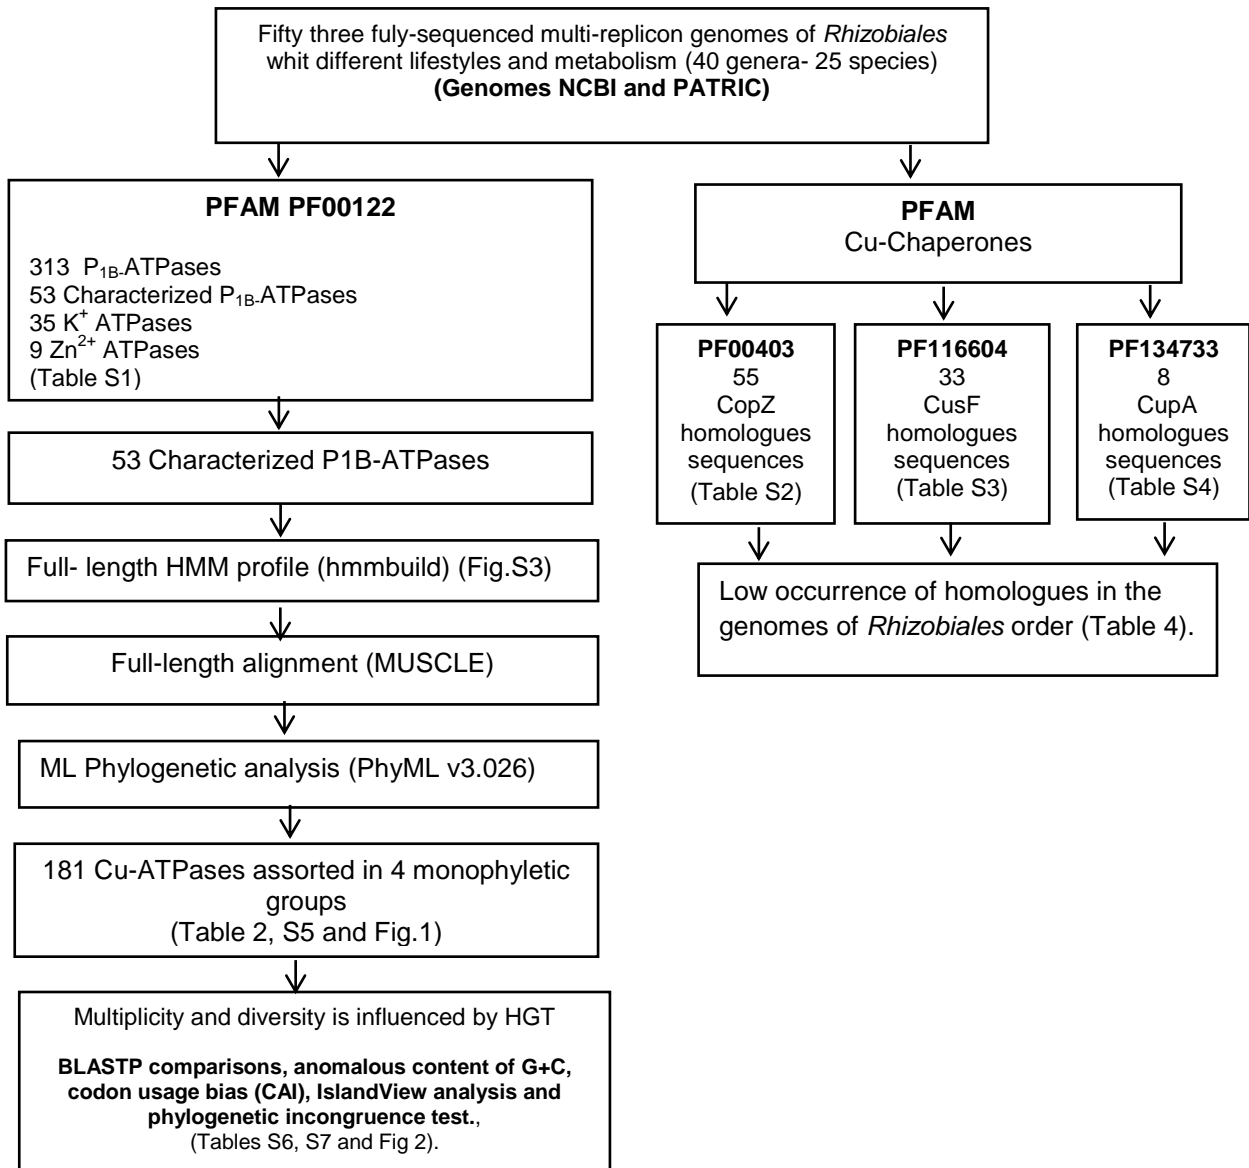

Figure S3. Diagram of data sources (in bold) and phylogenetic analysis.
